# Supplementary material
Source: MDPI journal article supplement (https://www.mdpi.com/2073-4344/10/5/534)

## Supplementary Information

Figure S1. XPS - C1s and O1s peaks

a) Hydrophobic C1s (top) and O1s (bottom) – As Deposited

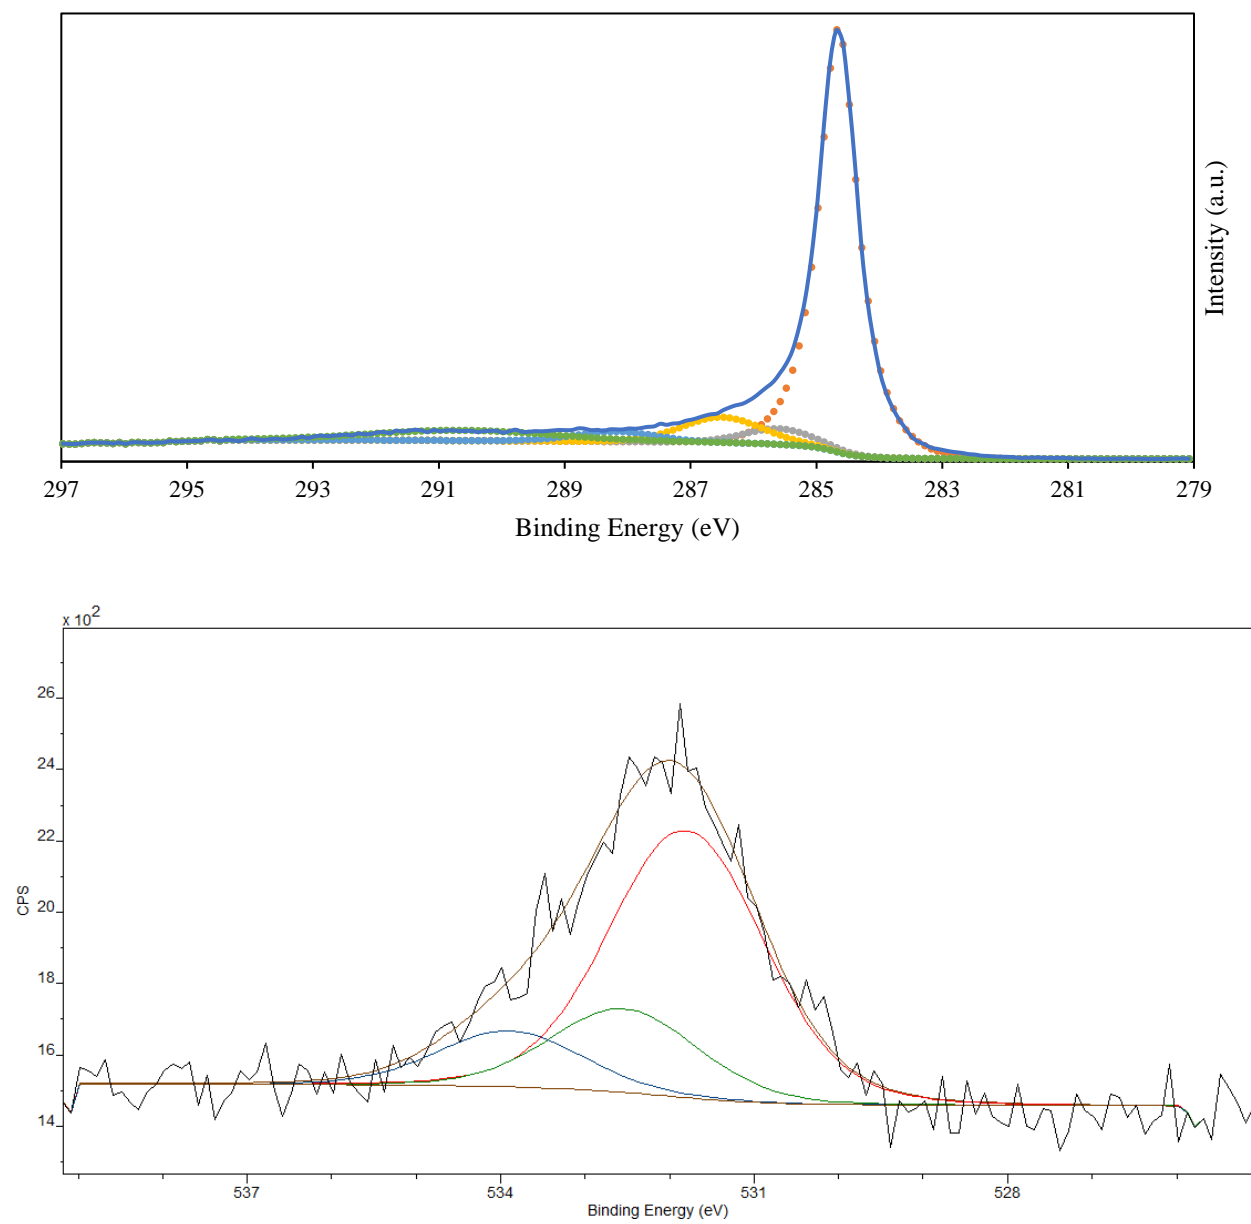

b) Hydrophilic C1s (top) and O1s (bottom) – As Deposited

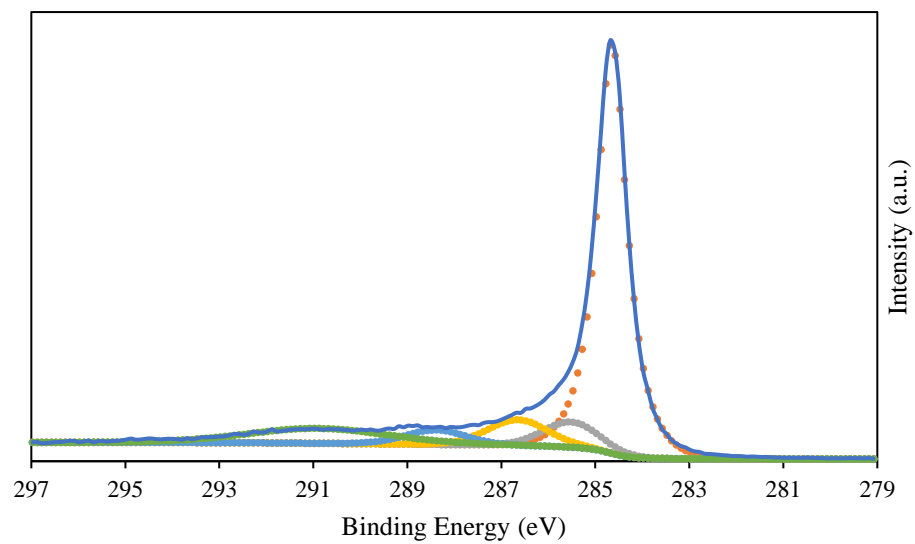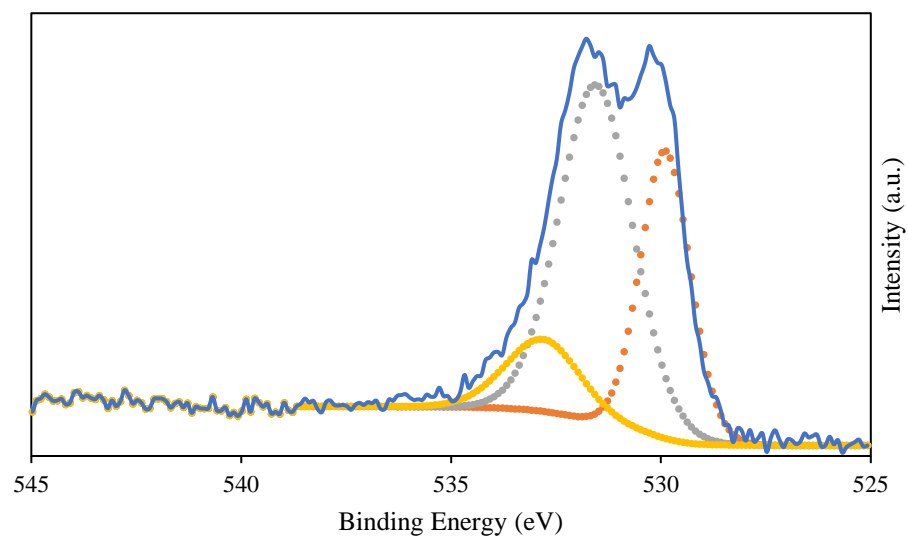

c) VCG C1s (top) and O1s (bottom) – As Deposited

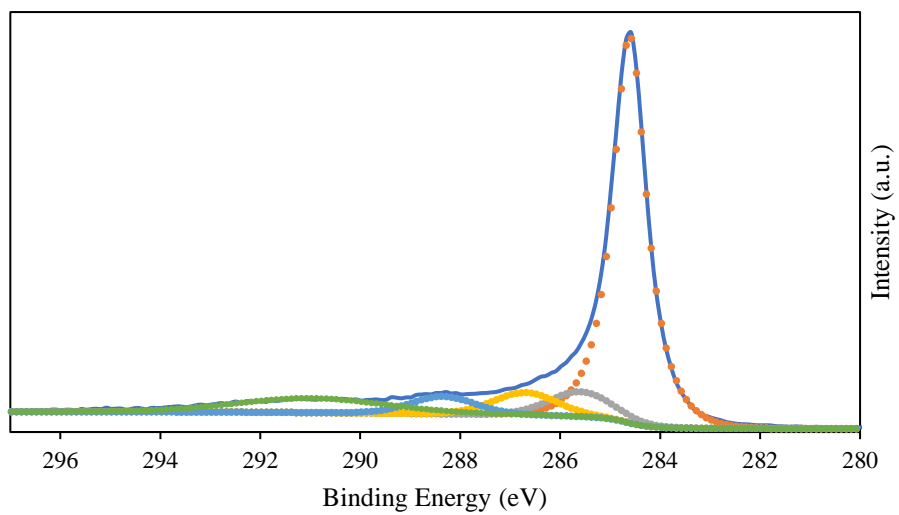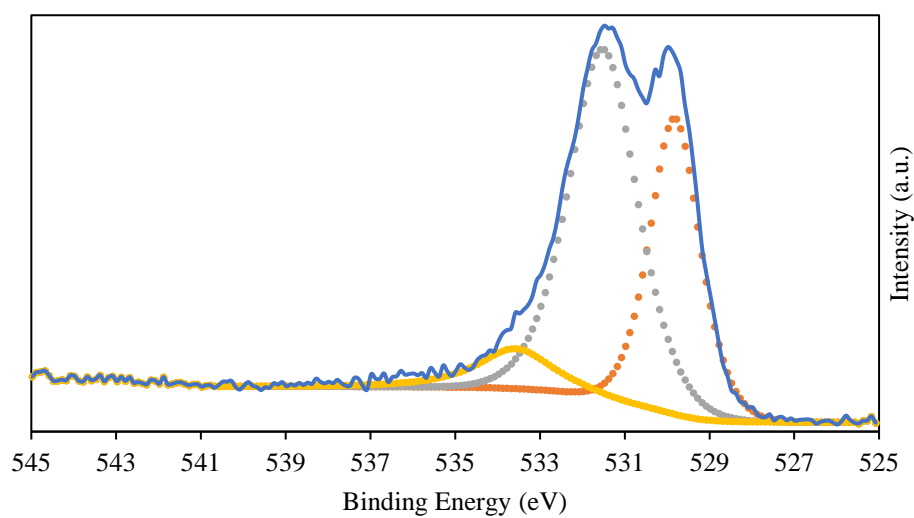

d) Hydrophobic C1s (top) and O1s (bottom) – 2 months

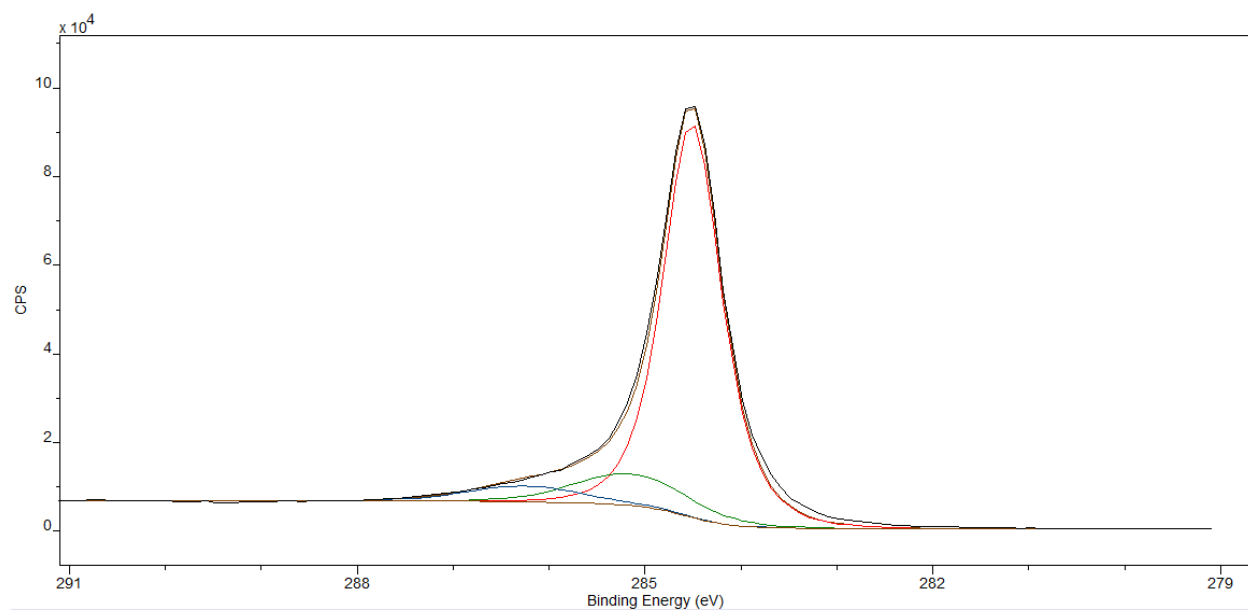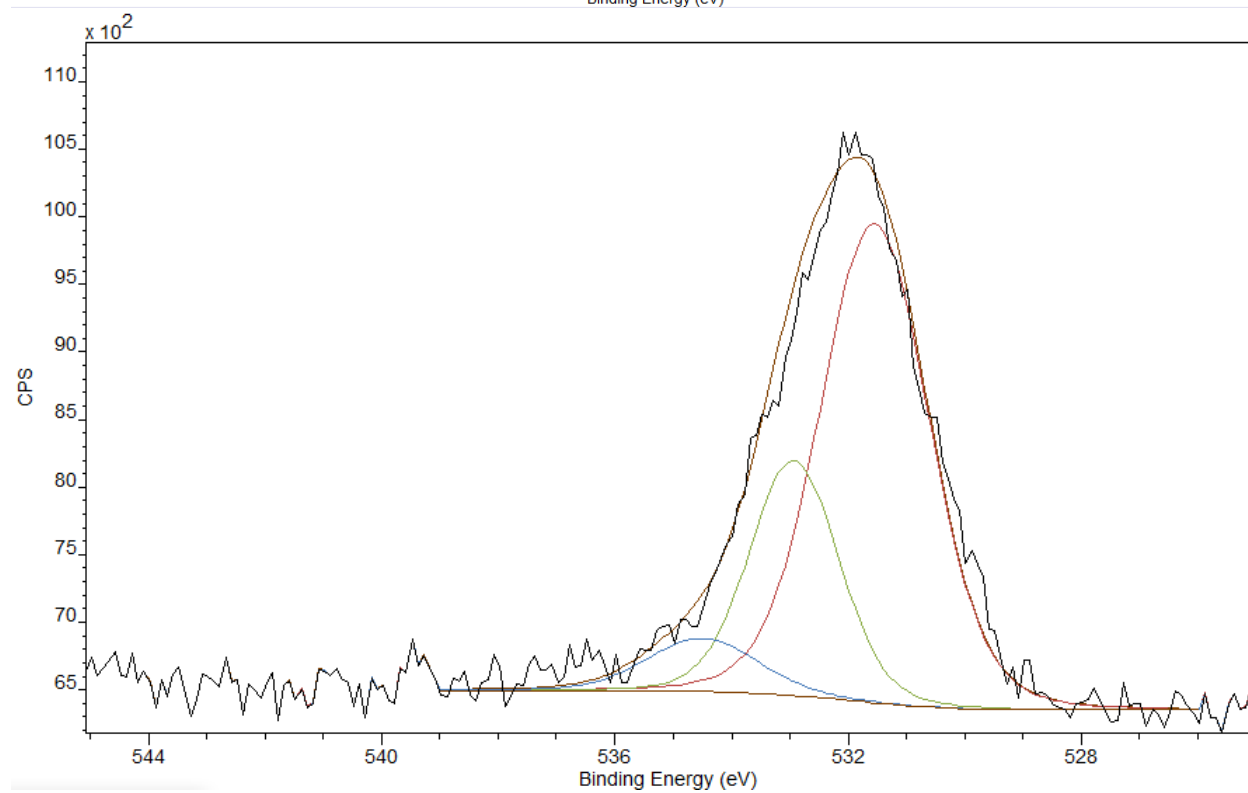

e) Hydrophilic C1s (top) and O1s (bottom) – 2 months

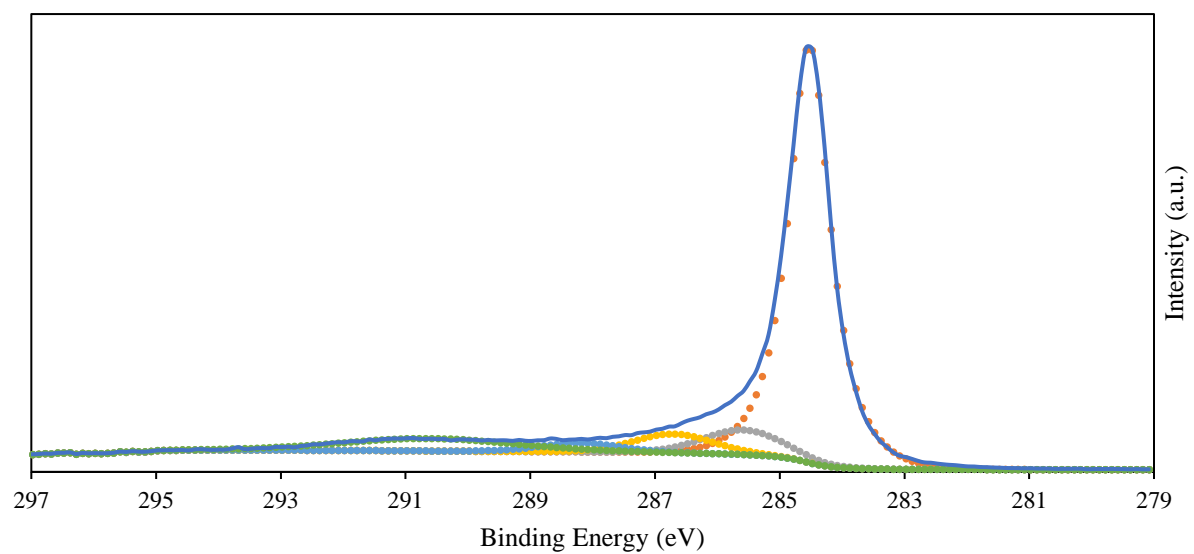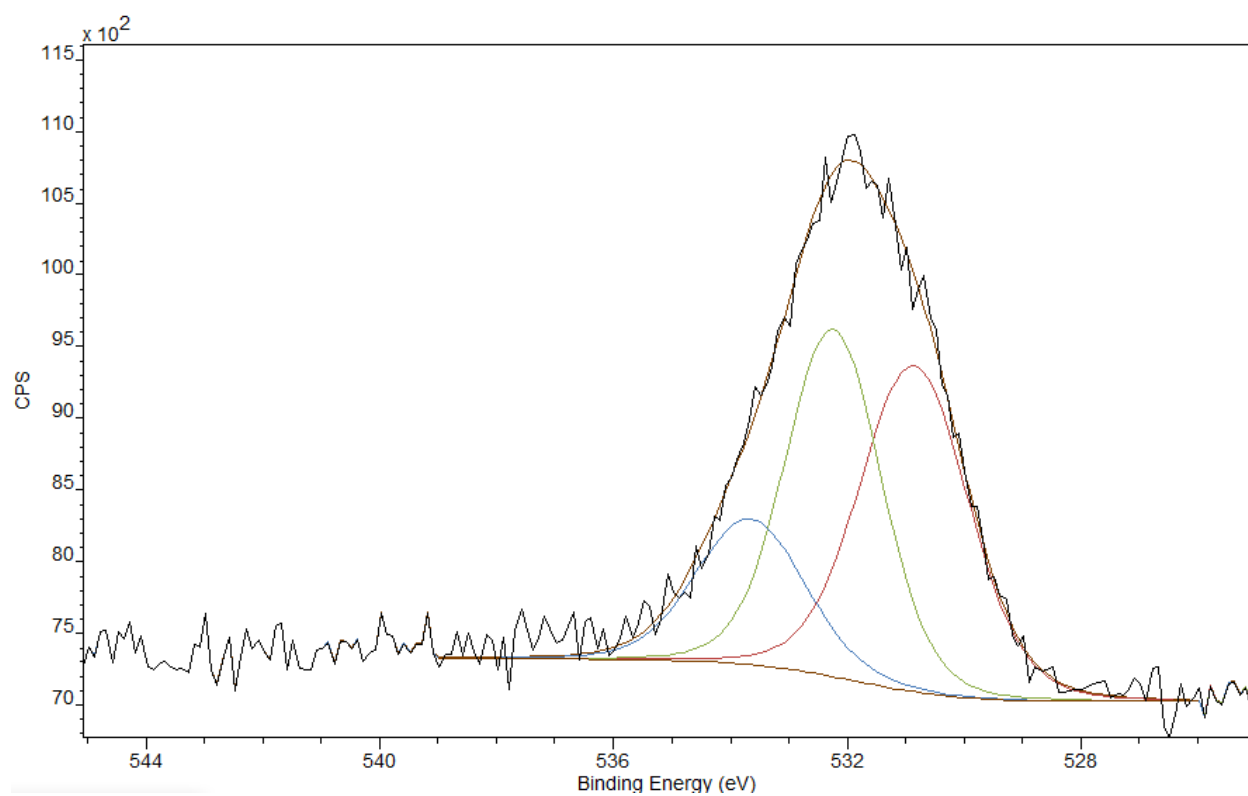

f) VCG C1s (top) and O1s (bottom) – 2 months

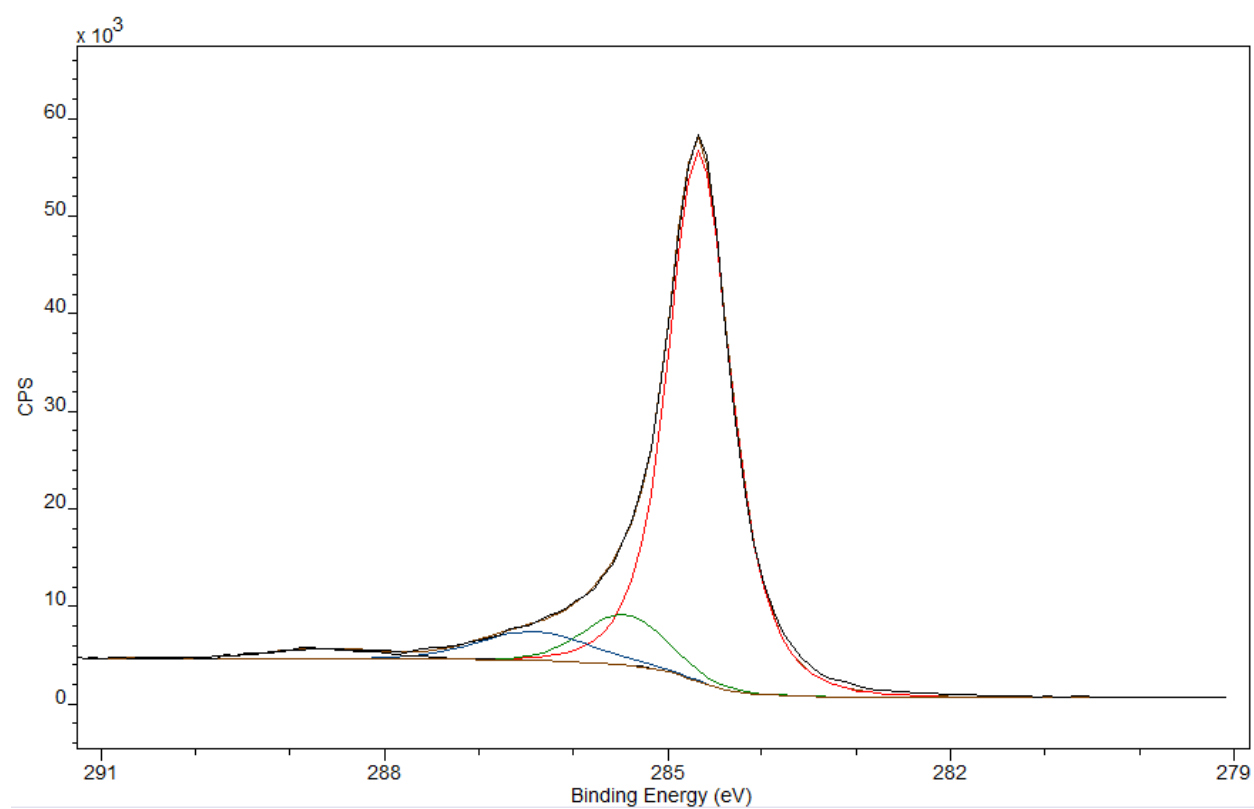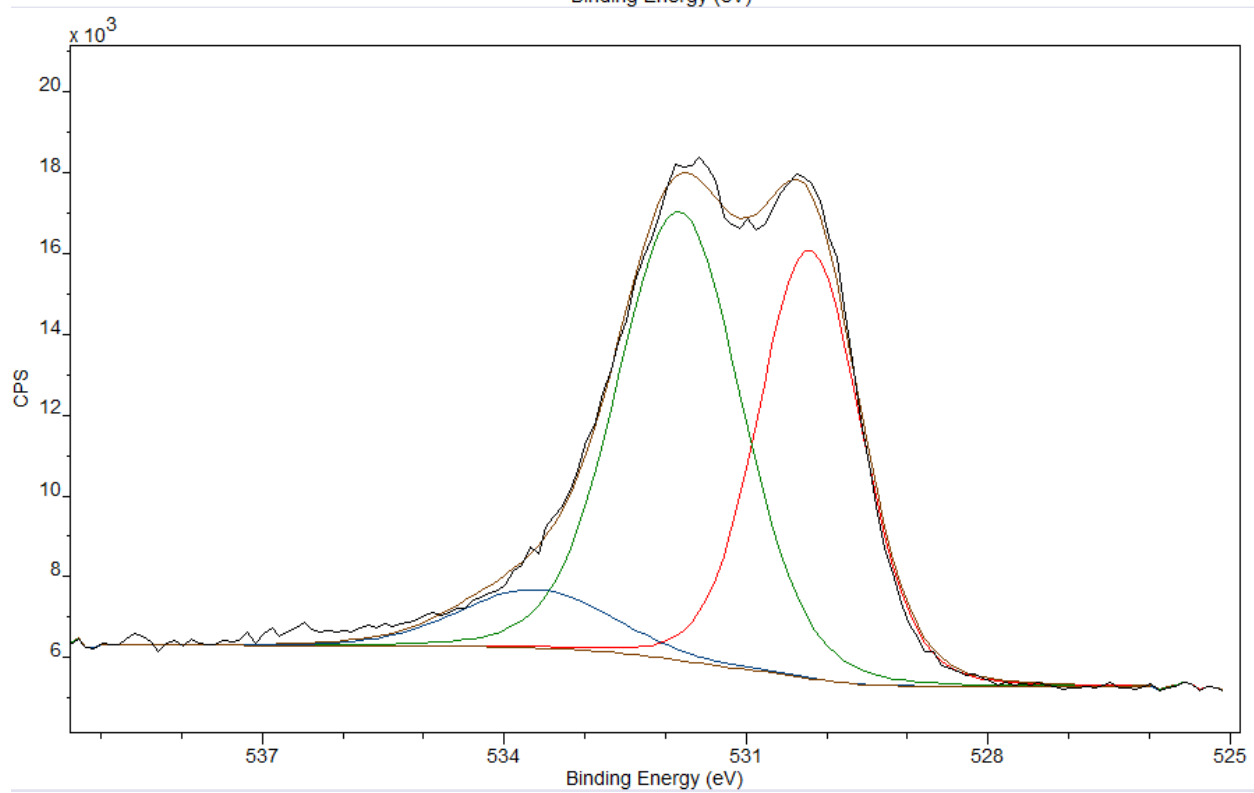

g) VCG Fe 2p Peak (Top) and Shirley background subtracted (Bottom) – as deposited

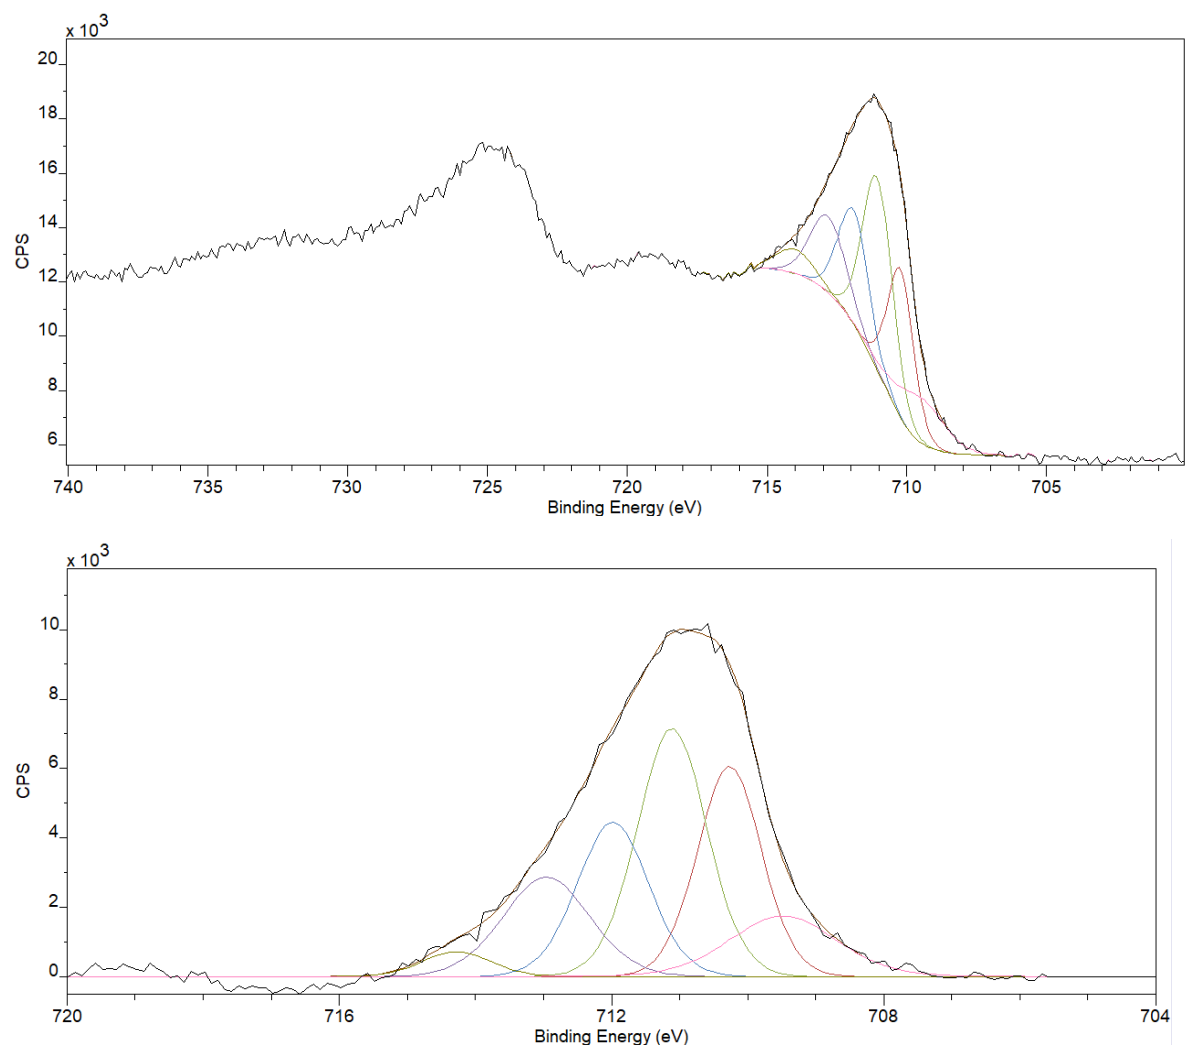

Figure S2. [Fe]/[C] Ratio

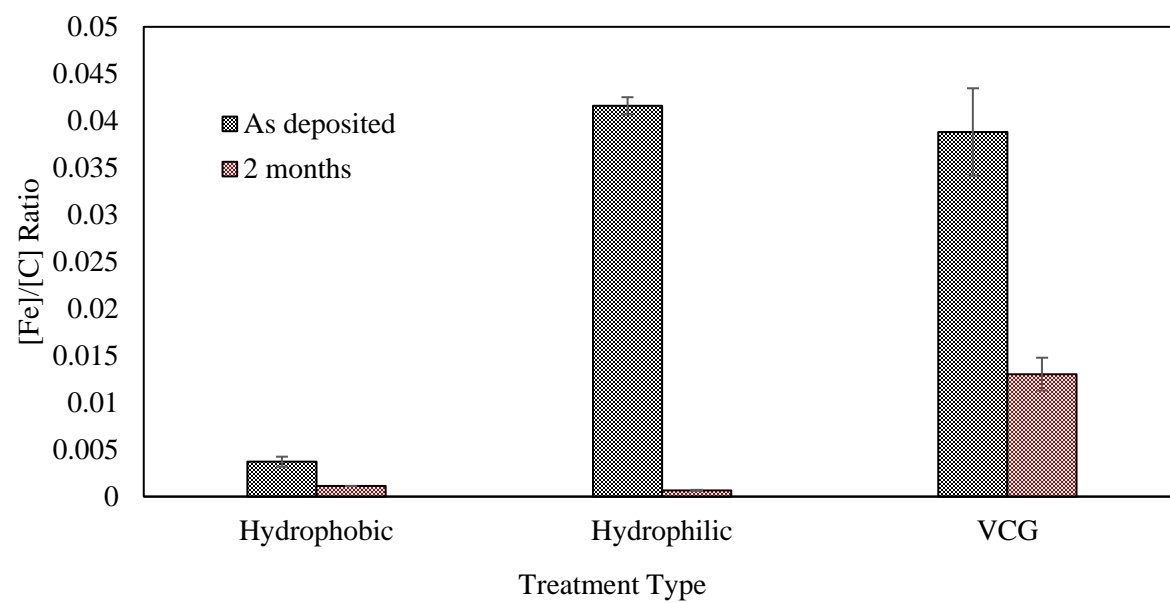

Supplement: s1 [file s1]
